# Supplementary material for: Agonistic CD27 antibody potency is determined by epitope-dependent receptor clustering augmented through Fc-engineering
Source: PubMed Central journal article supplement (PMC8921514; doi:10.1038/s42003-022-03182-6), 2022-03-14
Supplement: 42003_2022_3182_MOESM3_ESM.pdf [file 42003_2022_3182_MOESM3_ESM.pdf]

## Description of Additional Supplementary Files

**File name:** Supplementary Data 1

**Description:** Source data.
