# Supplementary material for: Agonistic CD27 antibody potency is determined by epitope-dependent receptor clustering augmented through Fc-engineering
Source: PubMed Central journal article supplement (PMC8921514; doi:10.1038/s42003-022-03182-6), 2022-03-14
Supplement: 42003_2022_3182_MOESM5_ESM.pdf [file 42003_2022_3182_MOESM5_ESM.pdf]

## Reporting Summary

Nature Portfolio wishes to improve the reproducibility of the work that we publish. This form provides structure for consistency and transparency in reporting. For further information on Nature Portfolio policies, see our [Editorial Policies](#) and the [Editorial Policy Checklist](#).

### Statistics

For all statistical analyses, confirm that the following items are present in the figure legend, table legend, main text, or Methods section.

- | n/a                                 | Confirmed                                                                                                                                                                                                                                                                                      |
|-------------------------------------|------------------------------------------------------------------------------------------------------------------------------------------------------------------------------------------------------------------------------------------------------------------------------------------------|
| <input type="checkbox"/>            | <input checked="" type="checkbox"/> The exact sample size ( $n$ ) for each experimental group/condition, given as a discrete number and unit of measurement                                                                                                                                    |
| <input type="checkbox"/>            | <input checked="" type="checkbox"/> A statement on whether measurements were taken from distinct samples or whether the same sample was measured repeatedly                                                                                                                                    |
| <input type="checkbox"/>            | <input checked="" type="checkbox"/> The statistical test(s) used AND whether they are one- or two-sided<br><i>Only common tests should be described solely by name; describe more complex techniques in the Methods section.</i>                                                               |
| <input type="checkbox"/>            | <input checked="" type="checkbox"/> A description of all covariates tested                                                                                                                                                                                                                     |
| <input type="checkbox"/>            | <input checked="" type="checkbox"/> A description of any assumptions or corrections, such as tests of normality and adjustment for multiple comparisons                                                                                                                                        |
| <input type="checkbox"/>            | <input checked="" type="checkbox"/> A full description of the statistical parameters including central tendency (e.g. means) or other basic estimates (e.g. regression coefficient) AND variation (e.g. standard deviation) or associated estimates of uncertainty (e.g. confidence intervals) |
| <input checked="" type="checkbox"/> | <input type="checkbox"/> For null hypothesis testing, the test statistic (e.g. $F$ , $t$ , $r$ ) with confidence intervals, effect sizes, degrees of freedom and $P$ value noted<br><i>Give <math>P</math> values as exact values whenever suitable.</i>                                       |
| <input checked="" type="checkbox"/> | <input type="checkbox"/> For Bayesian analysis, information on the choice of priors and Markov chain Monte Carlo settings                                                                                                                                                                      |
| <input checked="" type="checkbox"/> | <input type="checkbox"/> For hierarchical and complex designs, identification of the appropriate level for tests and full reporting of outcomes                                                                                                                                                |
| <input checked="" type="checkbox"/> | <input type="checkbox"/> Estimates of effect sizes (e.g. Cohen's $d$ , Pearson's $r$ ), indicating how they were calculated                                                                                                                                                                    |

*Our web collection on [statistics for biologists](#) contains articles on many of the points above.*

### Software and code

Policy information about [availability of computer code](#)

**Data collection** FACS samples were acquired on BD FACS Canto II or BD FACS Calibur software. Biacore data was collected using Biacore T200 Evaluation software (GE Healthcare Life Sciences, RRID: SCR\_003070) and microscopy images were acquired using NimOS 1.18 software (ONI Oxford). Western blot images were acquired using Biospectrum AC Imaging system software.

**Data analysis** FACS data: Cytobank 7.2 software (RRID: SCR\_014043), Images (microscopy/western blot): Image J 1.52 (RRID: SCR\_019718), Statistics: Graphpad Prism 9 (RRID: SCR\_002798)

For manuscripts utilizing custom algorithms or software that are central to the research but not yet described in published literature, software must be made available to editors and reviewers. We strongly encourage code deposition in a community repository (e.g. GitHub). See the Nature Portfolio [guidelines for submitting code & software](#) for further information.

### Data

Policy information about [availability of data](#)

All manuscripts must include a [data availability statement](#). This statement should provide the following information, where applicable:

- Accession codes, unique identifiers, or web links for publicly available datasets
- A description of any restrictions on data availability
- For clinical datasets or third party data, please ensure that the statement adheres to our [policy](#)

All data supporting the findings of this study are available within the published article and its supplementary information files. Source data are provided in Supplementary Data 1. All other data are available from the corresponding author upon reasonable request.

## Field-specific reporting

Please select the one below that is the best fit for your research. If you are not sure, read the appropriate sections before making your selection.

Life sciences  Behavioural & social sciences  Ecological, evolutionary & environmental sciences

For a reference copy of the document with all sections, see [nature.com/documents/nr-reporting-summary-flat.pdf](https://www.nature.com/documents/nr-reporting-summary-flat.pdf)

## Life sciences study design

All studies must disclose on these points even when the disclosure is negative.

|                 |                                                                                                                                                                                                                                                                                                                                                                                                                                                                                                                                                                                                                                                                                                                                                                                                                                                                                                                                                                            |
|-----------------|----------------------------------------------------------------------------------------------------------------------------------------------------------------------------------------------------------------------------------------------------------------------------------------------------------------------------------------------------------------------------------------------------------------------------------------------------------------------------------------------------------------------------------------------------------------------------------------------------------------------------------------------------------------------------------------------------------------------------------------------------------------------------------------------------------------------------------------------------------------------------------------------------------------------------------------------------------------------------|
| Sample size     | No statistical methods were used to predetermine sample size in either in vivo/ex vivo or in vitro experiments. For in vivo/ex vivo experiments sample size were chosen based on previous experience in the mouse models used (PMID: 29198913). For experiments involving animals, at least n=4 mice per group were used.<br>For in vitro studies, the experiments were repeated at least 3 times (with exception of confocal microscopy, western blot and cross-blocking of CD70 with varli and hCD27.15) with samples size of at least 3 within each experiment to control technical variations. For the experiments that using human PBMC, experiments were repeated with at least 3 different donors to control for biological variations.                                                                                                                                                                                                                             |
| Data exclusions | No data were excluded from the analyses.                                                                                                                                                                                                                                                                                                                                                                                                                                                                                                                                                                                                                                                                                                                                                                                                                                                                                                                                   |
| Replication     | Experiments including animals were repeated at least one time as stated in the figure legends. Due to low variance, the animal experiment assessing the difference between anti-CD27 m1 and m2a as well as the difference between hCD27.15 m1 and h2 was only conducted once, and statistical power was achieved with the group size employed.<br>For in vitro studies (except microscopy, western blot and cross-blocking of CD70 with varli and hCD27.15) at least 3 independent experiments were performed. Microscopy was only conducted once, since the number of cells assessed showed low variance and statistical power was achieved with the cell numbers assessed. The western blot and cross-blocking assay was only conducted once since both experiments were merely used as supporting data and confirmation for already existing data.<br>Details of experimental replicates are stated in the figure legends. All attempts at replication were successful. |
| Randomization   | Randomization of mice into treatment groups was performed. Prior to treatment, we ensured that the mean age were comparable among the various treatment groups. No randomization was used for the in vitro experiments, as it is not applicable to the study design.                                                                                                                                                                                                                                                                                                                                                                                                                                                                                                                                                                                                                                                                                                       |
| Blinding        | For the microscopy experiment, the evaluation of cluster size and numbers were collected by a blinded researcher. For the animal survival experiments, the mice were assessed by blinded researchers. In all other experiments, the investigators were not blinded.                                                                                                                                                                                                                                                                                                                                                                                                                                                                                                                                                                                                                                                                                                        |

## Reporting for specific materials, systems and methods

We require information from authors about some types of materials, experimental systems and methods used in many studies. Here, indicate whether each material, system or method listed is relevant to your study. If you are not sure if a list item applies to your research, read the appropriate section before selecting a response.

### Materials & experimental systems

| n/a                                 | Involved in the study                                           |
|-------------------------------------|-----------------------------------------------------------------|
| <input type="checkbox"/>            | <input checked="" type="checkbox"/> Antibodies                  |
| <input type="checkbox"/>            | <input checked="" type="checkbox"/> Eukaryotic cell lines       |
| <input checked="" type="checkbox"/> | <input type="checkbox"/> Palaeontology and archaeology          |
| <input type="checkbox"/>            | <input checked="" type="checkbox"/> Animals and other organisms |
| <input checked="" type="checkbox"/> | <input type="checkbox"/> Human research participants            |
| <input checked="" type="checkbox"/> | <input type="checkbox"/> Clinical data                          |
| <input checked="" type="checkbox"/> | <input type="checkbox"/> Dual use research of concern           |

### Methods

| n/a                                 | Involved in the study                              |
|-------------------------------------|----------------------------------------------------|
| <input checked="" type="checkbox"/> | <input type="checkbox"/> ChIP-seq                  |
| <input type="checkbox"/>            | <input checked="" type="checkbox"/> Flow cytometry |
| <input checked="" type="checkbox"/> | <input type="checkbox"/> MRI-based neuroimaging    |

## Antibodies

### Antibodies used

hCD27 hlgG1 (varlilumab)/hlgG2 In house based on sequence information of Keler et al. (Keler et al., 2015)  
 hCD27.15 hlgG1/hlgG2/hlgG1 V11/hlgG1 SELF In-house based on sequence information of Van Eenennaam et al. (Van Eenennaam et al., 2016)  
 hCD27 hlgG1/hlgG2/hlgG1 V11/hlgG1 SELF In-house Clone: AT133-2, AT133-5, AT133-11, AT133-14  
 Anti-CD27 mlgG1/mlgG2a In-house Clone: AT124-1  
 mCTLA-4 (9D9) BioXCell Cat. # BE0164; RRID: AB\_10949609  
 mCD25 (PC61) In-house produced from hybridoma purchased from ATCC PC61 hybridoma cells: ATCC TIB-222; RRID: AB\_2125456  
 mCD20 (18B12) In-house based on sequence information of Dunn et al. (Dunn et al., 2007); Clone: 18B12  
 PE-labelled goat anti-human IgG Fc secondary antibody Jackson ImmunoResearch Cat # 109-116-170; RRID: AB\_2337681  
 Viability Dye eF506 eBioscience Cat. # 65-0866-14  
 mCD3 FITC (OKT3) In-house produced from hybridoma purchased from ATCC OKT3 hybridoma cells: ATCC® CRL-8001; RRID:

AB\_2073169  
 mCD4 eF450 (GK1.5) eBioscience Cat. # 48-0041-82; RRID: AB\_10718983  
 mCD25 APC (PC61.5) eBioscience Cat. # 17-0251-82; RRID: AB\_469366  
 mFoxP3 PE (NRRF-30) eBioscience Cat. # 12-4771-82; RRID: AB\_529580  
 mCD45 PerCP Cy5.5 (30-F11) eBioscience Cat. # 45-0451-82; RRID: AB\_1107002  
 mF4/80 Alexa 647 (Cl:A3-1) Serotec/BioRad Cat. # MCA497A64; RRID: AB\_323931  
 mLy6c APC eF780 (HK1.4) eBioscience Cat. # 47-5932-82; RRID: AB\_2573992  
 mLy6G PE (RB6-8C5) eBioscience Cat. # 12-5931-82; RRID: AB\_466045  
 mCD11b eF450 (M1/70) eBioscience Cat. # 48-0112-82; RRID: AB\_1582236  
 mCD8 APC eF780 (53-6.7) eBioscience Cat. # 47-0081-82; RRID: AB\_1272185  
 mFcγRIV FITC (9E9 IgG) In-house (Tipton et al., 2015)  
 hCD8 APC (SK1) eBioscience Cat. # 17-0087-42; RRID: AB\_1311204  
 hFcγRIIb PE (6G11) kind gift from BioInvent International N/A  
 hCD3 FITC (SK7) eBioscience Cat. # 11-0036-42; RRID: AB\_1272072  
 hCD56 APC (N901) BD Cat # IM2474  
 hCD19 PerCP eF710 (J3-129) eBioscience Cat. # 46-0197-42; RRID: AB\_10669;10  
 hCD14 Pacific Blue (M5E2) BioLegend Cat. # 982504; RRID: AB\_2632615  
 hCD4 PerCP Cy5.5 (RPA-T4) eBioscience Cat. # 45-0049-42; RRID: AB\_1518744  
 hCD3 (OKT3) in-house  
 p-IκBα (Ser32/36) (5A5) Cell Signaling Cat # 9246; RRID: AB\_2267145  
 IκBα (Ser32) (14D4) Cell Signaling Cat # 2859; RRID: AB\_561111  
 α-tubulin (11H10) Cell Signaling Cat # 2125; RRID: AB\_2619646

Validation

Antibodies produced in-house were validated by ELISA. Commercially available and validated antibodies were validated on known cell subsets.

## Eukaryotic cell lines

Policy information about [cell lines](#)

Cell line source(s)

Mouse: BCL1 In-house (French et al., 2007)  
 Mouse: CT26 cells ATCC ATCC CRL-263; RRID: CVCL\_7256  
 Freestyle 293 F cells ThermoFisher Scientific Cat # R79007; RRID: CVCL\_D603  
 CHO-K1 ATCC ATCC CCL-61; RRID: CVCL\_021  
 FcγRIIb CHO-K1 In-house (Tutt et al., 2015)  
 NF-κB/GFP hCD27 Jurkat cells NF-κB Jurkat GFP purchased from System Biosciences, transfected in house Cat # TR850A-1 (NF- κB Jurkat GFP cells)  
 hCD27 Jurkat Parental Jurkat cells purchased from ATCC, transfected in-house ATCC TIB-152; RRID: CVCL\_0367 (Jurkat E6-1 cells)  
 hCD27/GFP Jurkat Parental Jurkat cells purchased from ATCC, transfected in-house ATCC TIB-152; RRID: CVCL\_0367 (Jurkat E6-1 cells)

Authentication

Cell lines did not undergo complete authentication upon receipt from the source indicated. Cell lines obtained from sources such as ATCC were authenticated prior to purchase and rapidly expanded in culture and cryopreserved at early stages. Parental cell lines stably transfected with antigens of interest were regularly tested for antigen-expression by flow cytometry.

Mycoplasma contamination

The cell lines were tested mycoplasma-free

Commonly misidentified lines  
(See [ICLAC](#) register)

Cell lines employed were not listed in the misidentified cell lines database curated by the ICLAC

## Animals and other organisms

Policy information about [studies involving animals](#); [ARRIVE guidelines](#) recommended for reporting animal research

Laboratory animals

Mouse: BALB/c Purchased from Charles River, maintained in house Strain Code: 028  
 Mouse: hCD27 tg: BALB/c.B6-Tg(hCD27) BALB/c CellDex Therapeutics (He et al., 2013)  
 Mouse: FcγRIV-/-BALB/c In house (Tipton et al., 2015)

All mice were fed regular chow, had water freely and were maintained in a conventional facility. All experiments were conducted with age-matched (8-12 week old) female mice. Animals were randomly assigned to experimental groups and housed together under the same conditions.

Wild animals

The study did not involve wild animals

Field-collected samples

The study did not involve field-collected samples

Ethics oversight

All experiments were conducted according to the UK Home Office license guidelines and in accordance with the Animals (Scientific Procedures) Act 1986 under the Procedure Project Licences P81E129B7 and P4D9C89EA and approved by the University of Southampton Ethical Committee.

Note that full information on the approval of the study protocol must also be provided in the manuscript.

## Flow Cytometry

### Plots

Confirm that:

- The axis labels state the marker and fluorochrome used (e.g. CD4-FITC).
- The axis scales are clearly visible. Include numbers along axes only for bottom left plot of group (a 'group' is an analysis of identical markers).
- All plots are contour plots with outliers or pseudocolor plots.
- A numerical value for number of cells or percentage (with statistics) is provided.

### Methodology

Sample preparation

For flow cytometric analysis single cell suspensions were generated. Murine tissue samples were firstly incubated with Fc-gamma receptor block (where the antigens of interest were not FcγRs), following incubation with antibodies for specific markers of interest and subsequently underwent red blood cell lysis and fixation in 2% paraformaldehyde and further processed as outlined in the methods. For intracellular staining, cells were fixed and permeabilized and stained with the antibodies against intracellular markers of interest. For enumeration and analysis of myeloid cells, tissue was chopped into small pieces and digested using Liberase TL (Sigma Aldrich) according to the manufacturer's protocol. Digested tissue was then mashed into a single cell suspension and treated as outlined above.

Instrument

Samples were analyzed on a BD FACSCanto II or BD FACSCalibur (BD Biosciences)

Software

Data were collected using FACSDiva software (BD Pharmingen) and analyzed using Cytobank software version 7.2

Cell population abundance

No cell sorting was performed.

Gating strategy

Gating strategies for all relevant experiments are depicted in the manuscript.

- Tick this box to confirm that a figure exemplifying the gating strategy is provided in the Supplementary Information.
